# Supplementary material for: Controllable synthesis of Bi4O5Br2 ultrathin nanosheets for photocatalytic removal of ciprofloxacin and mechanism insight
Source: Royal Society of Chemistry journal article supplement (doi:10.1039/c5ta02388b), 2015-01-01
Supplement: c5ta02388b1.pdf [file c5ta02388b1.pdf]

## **Supplementary Information**

### **Controllable Synthesis of $\text{Bi}_4\text{O}_5\text{Br}_2$ Ultrathin Nanosheets for Photocatalytic Removal of Ciprofloxacin and Mechanism Insight**

Jun Di, Jiexiang Xia\*, Mengxia Ji, Sheng Yin, Hongping Li, Hui Xu, Qi Zhang,  
Huaming Li\*

School of Chemistry and Chemical Engineering, Institute of Energy, Jiangsu  
University, 301 Xuefu Road, Zhenjiang, 212013, P. R. China

\*Corresponding author: Tel.: +86-511-88791108; Fax: +86-511-88791108;

E-mail address: xjx@ujs.edu.cn; lhm@ujs.edu.cn

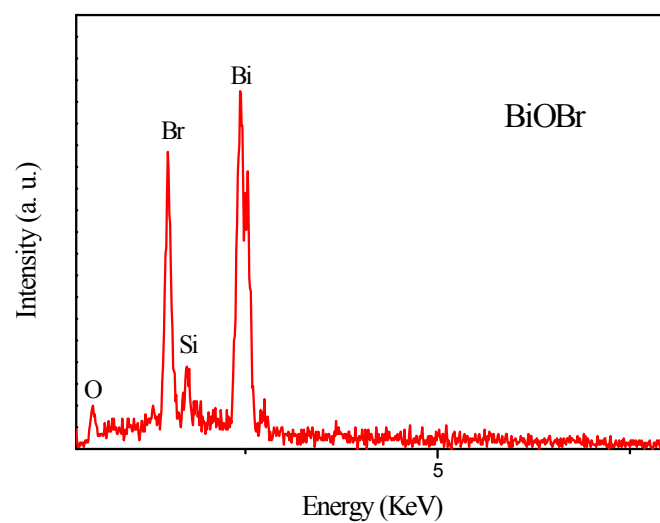

**Figure S1.** EDS analysis of the as-prepared BiOBr materials.

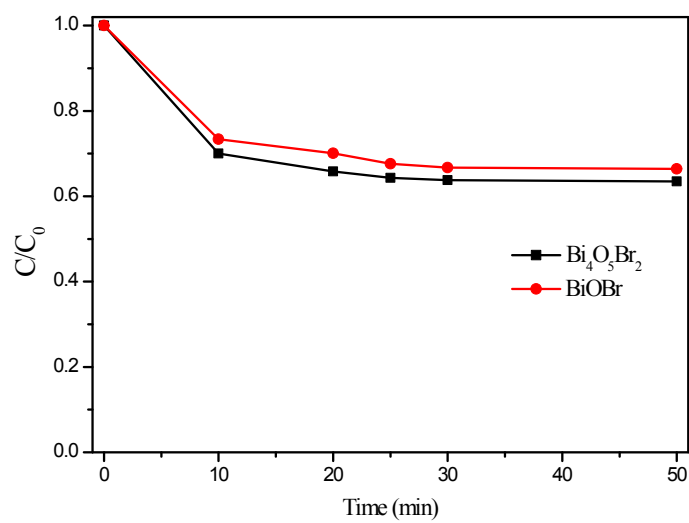

**Figure S2** Time profiles of adsorption of CIP over  $\text{Bi}_4\text{O}_5\text{Br}_2$  and BiOBr materials.

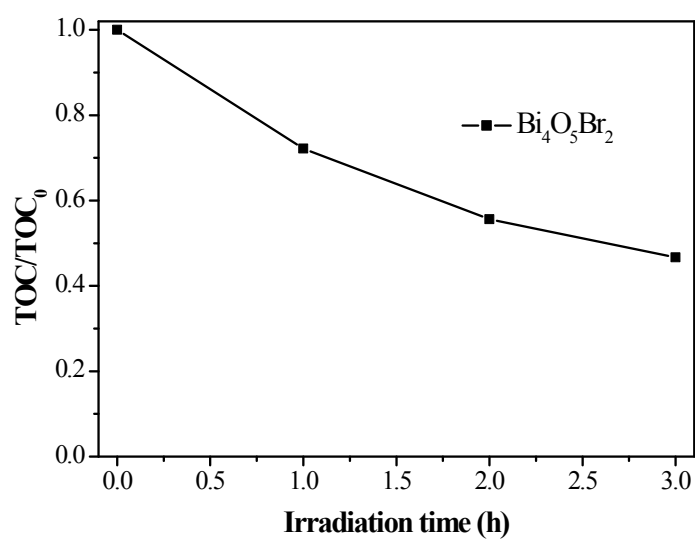

**Figure S3** The decrease of TOC during photocatalytic degradation of CIP on Bi<sub>4</sub>O<sub>5</sub>Br<sub>2</sub> ultrathin nanosheets under visible light irradiation.

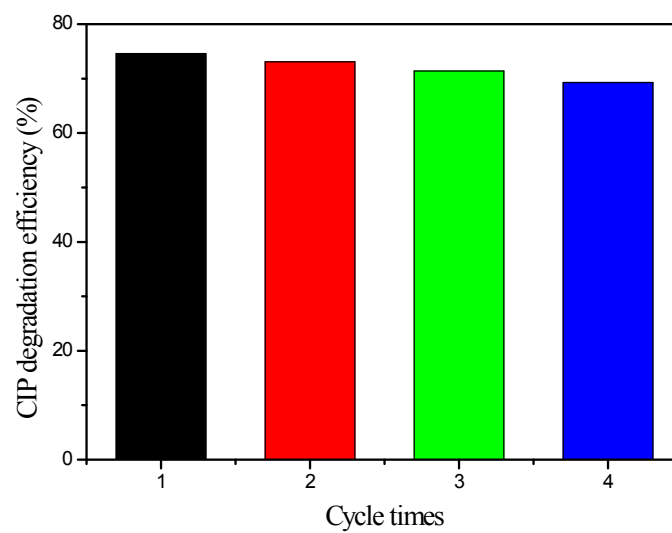

**Figure S4** Cycling runs for the photodegradation of CIP in the presence of Bi<sub>4</sub>O<sub>5</sub>Br<sub>2</sub> ultrathin nanosheets under visible light irradiation.

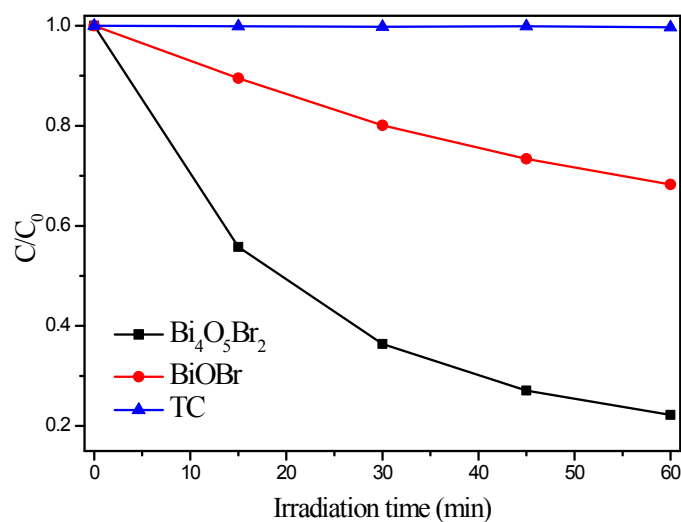

**Figure S5** Photocatalytic degradation of TC in the presence of  $\text{Bi}_4\text{O}_5\text{Br}_2$  ultrathin nanosheets and  $\text{BiOBr}$  materials under visible light irradiation.

**Table S1** Pseudo-first-order rate constant for CIP photocatalytic oxidation under different photocatalysts

| Series | Photocatalyst                      | The first order<br>kinetic equation | $k$<br>( $\text{min}^{-1}$ ) | $R^2$  |
|--------|------------------------------------|-------------------------------------|------------------------------|--------|
| 1      | $\text{BiOBr}$                     | $-\ln(C/C_0) = 0.0059t$             | 0.0059                       | 0.9998 |
| 2      | $\text{Bi}_4\text{O}_5\text{Br}_2$ | $-\ln(C/C_0) = 0.0113t$             | 0.0113                       | 0.9993 |
